The nucleotide sequence of Atlantic salmon growth hormone cDNA

James Lorens, Audun H.Nerland, Rune Male, Ivar Lossius, Wenche Telle and Geir Totland

Marine Genetics A/S, Laboratory of Biotechnology, University of Bergen, PO Box 3152, Aarstad, 5001 Bergen, Norway  
 Submitted February 17, 1989 EMBL accession no. X14305

A cDNA library constructed from Atlantic salmon (*Salmo salar*) pituitary mRNA in  $\lambda$ gt10, was screened with oligonucleotide probes derived from conserved growth hormone sequences. Several clones were isolated and two were selected for sequencing. The 1169 bp nucleotide sequence (Figure 1) encodes a 210 amino acid prepeptide with a putative 22 amino acid leader sequence.

```

1      CAACCGACCGCCCGCCTTTCCAGTTAAGTATCATCTCTGGCAATTAGAGTAAAA  ATG  GGA  CAA  GTG  TTT  CTC  CTG  ATG  CCA  GTC  TTA  CTG
1      M  G  Q  V  F  L  L  H  P  V  L  L
93  GTC  AGT  TGT  TTT  CTG  AOC  CAA  GGG  GCA  GCG  ATG  GAA  AAC  CAA  CCG  CTC  TTC  AAC  ATC  GGG  GTC  AAC  GGG  GTG  CAA  CAT  CTC  CAC  GTA
13  V  S  C  F  L  S  Q  G  A  A  N  E  M  Q  R  L  F  M  I  A  V  H  R  V  R  Q  L  M  K  I  F  L  L  D  F
180  ATG  GCT  CAG  AAG  ATG  TTC  AAT  GAC  TTT  GAA  GGT  ACC  CTG  TTG  CTT  GAT  GAA  GGC  AGA  CAG  CTG  AAC  AAG  ATA  TTC  CTG  GAC  TTC
42  M  A  Q  K  M  F  M  D  F  E  G  T  L  L  P  D  E  R  R  Q  L  M  K  I  F  L  L  D  F
267  TGT  AAC  TCT  GAC  TCC  ATC  GTG  AGC  CCA  ATC  GAC  AAG  CTT  GAG  ACT  CAG  AAG  AGT  TCA  GTC  CTG  AAC  CTG  CTC  CAT  ATC  TCT  TTC  GGT
71  C  M  S  D  S  I  V  S  P  I  D  K  L  E  T  Q  K  S  S  V  L  K  L  L  H  I  S  F  R
354  CTG  ATT  GAA  TCC  TAG  TAC  CCT  AGC  CAG  ACC  CTG  ACC  ATC  TCC  AAC  GGC  CTA  ATC  GTC  AGA  AAC  TCC  AAC  CAG  ATC  TCT  GAG  AAG
100  L  I  E  S  M  E  Y  P  S  Q  T  L  T  I  S  M  S  L  H  V  R  M  S  M  Q  I  S  E  K
441  CTC  AGC  GAC  CTC  AAA  GTG  GGC  ATC  AAC  CTG  CTC  ATC  AAG  GGC  AGC  CAG  GAT  GGC  GTA  CTG  AGC  CTG  GAT  GAC  AAT  GAC  TCT  CAG  CAG
129  L  S  D  L  K  V  G  I  M  L  L  I  K  G  S  Q  D  G  V  L  S  L  D  D  M  D  S  Q  Q
528  CTG  CCC  CCC  TAC  GGC  AAC  TAC  TAC  CAG  AAC  CTG  GGG  GGC  GAC  GGC  AAC  GTC  AGG  AGG  AAC  TAT  GAG  TTG  TTG  GGC  TGC  TTC  AAG  AAG
158  L  P  P  Y  G  M  Y  Y  L  G  M  L  G  G  D  G  D  G  A  A  V  R  R  N  Y  E  L  L  A  C  F  K  K
615  GAC  ATG  CAC  AAG  GTC  GAG  ACC  TAC  CTG  ACC  GTC  GGC  AAG  TGC  AGS  AAG  TCA  CTG  GAG  GGC  AAC  TGC  ACT  CTG  TAG  AACTGGCTGGAGAG
187  D  H  H  K  V  E  T  Y  L  T  V  A  K  C  R  K  S  L  E  A  N  C  T  L  -
705  GCGAGCGCAGAGAGCGCTGCTCCAGCGTTCGGGTTCCCGAGATACAGATTGCGCCTTGCCCTGCACCTGAAGAGCATTTTCATTTGAGATCTCCATTCGAAGCTCTTTTAGTCTT
820  GAATGAGTTTAATTTGGATCTCTGGTAGAGCGCTGACCTCCAGGGGTTTTTCAGGAATTTGCAATTTTCTCTGAAATCAAGAGCGACTTTCTATATTCGACTACTACTCTGAOCTAC
935  CATTGATGATGATCTTATAGAAAAGGTTATTAAGTCTCTATTTAGATATATGATTCATGGTGTGCTACTCTTTATGCAATACATCATATTAAGGCGTGAATGGGAAGCTGT
1050  AGAGCTCCAGACTTTTGGATATATATATTTAGATTTATCTCTTTAAGTATTTTCATTTCTATCTATTGTTGAAACTAATAGTACATATTTTCAATAAAGCTTCTCTC
1165  TCTGC
    
```

Figure 1.

The encoding sequence demonstrates a high degree of similarity with salmonid growth hormone sequences (Table 1).

Table 1.

|               | Degree of identity (%)         |                             |                        | Ref. |
|---------------|--------------------------------|-----------------------------|------------------------|------|
|               | Nucleotides<br>(coding region) | Signal peptide<br>(aa 1-22) | Hormone<br>(aa 23-210) |      |
| Chum salmon   | 95.6                           | 100                         | 96.3                   | 1    |
| Coho salmon   | 97.0                           | 100                         | 93.8                   | 2    |
| Rainbow trout | 96.5                           | 91                          | 96.3                   | 3    |

The 5'-untranslated region is nearly identical among the salmonids, while the 3'-untranslated region is relatively less conserved. Genomic cloning has revealed two distinct sgh genes (unpublished results). This sequence corresponds to the locus denoted sgh I.

References:

1. Sekine S., et al. (1985) Proc Natl Acad Sci USA 82:4304-4310
2. Nicoll, C.S., et al. (1987) Gen Comp Endocrinol 68:387-399
3. Agellon, L.B. and Chen, T.T. (1986) DNA 5:463-471
